# Supplementary material for: Camel Milk Resistome in Kuwait: Genotypic and Phenotypic Characterization
Source: MDPI journal article supplement (doi:10.3390/antibiotics13050380), 2024-04-23
Supplement: s1 [file s1]

## Camel milk resistome: genotypic and phenotypic characterization

**Table S1.** The numbers of read counts remaining after selected processing step

| Sample ID | Raw      | Decontaminated | Filtered | Mapped to Contigs |
|-----------|----------|----------------|----------|-------------------|
| CM_007    | 48585364 | 27733006       | 21397996 | 2838883           |
| CM_009    | 48641326 | 26610272       | 21072204 | 17078334          |
| CM_011    | 48282716 | 23624684       | 17820172 | 12797469          |
| CM_013    | 48434292 | 23807964       | 17899420 | 12914118          |
| CM_014    | 48668986 | 16587446       | 12635028 | 2134738           |
| CM_015    | 48604458 | 46440846       | 36890372 | 3909521           |
| CM_027    | 48334188 | 22305436       | 16549512 | 9191950           |
| CM_028    | 48563774 | 27400450       | 21073080 | 15303608          |
